# Supplementary material for: Managing Deviating EQA Results: A Survey to Assess the Corrective and Preventive Actions of Medical Laboratories Testing for Oncological Biomarkers
Source: MDPI journal article supplement (doi:10.3390/diagnostics10100837), 2020-10-18
Supplement: s1 [file s1]

# Supplementary Materials

Table S1. Overview of survey questions.

General questions 2–4 were initially included in the survey, but in later schemes they were included in the EQA datasheets and linked to the survey answers for the identical participants. ALK, ALK receptor tyrosine kinase; EQA, external quality assessment; FISH, fluorescence in-situ hybridisation; SOP, standard operating procedure; Q, question.

**INTRODUCTION:** Please find below a short questionnaire on the follow-up the 2018 Lung EQA scheme results. You can select the appropriate option in the dropdown menu, which will become visible when clicking on 'please choose'. If required, please specify your answer in more detail in the column next to the selected option. Your contribution to this study is highly appreciated.

**EQA ID:** Prefilled with participants anonymous number to the EQA scheme e.g., 2018LUNG0001

- ☐ One answer possible
- ☐ Multiple answers possible

A. CASE-SPECIFIC QUESTIONS Repeated for all cases in which an error occurred

**SUBSCHEME:** Prefilled with relevant marker and subscheme e.g., ALKFISH

**CASE NR:** Prefilled with the sample label and error type e.g., L18.ALKFISH1: false-negative

**Q1: During which phase in the test process did the error occur?**

- ☐ Pre-analytical phase
- ☐ Analytical phase
- ☐ Post-analytical phase
- ☐ I don't know

**Q2: What was the cause of this error?**

- ☐ Clerical error
- ☐ Methodological problem
- ☐ Equipment problem
- ☐ Technical problem
- ☐ Reagent problem
- ☐ Personnel error
- ☐ Interpretation error
- ☐ Problem with EQA material
- ☐ I don't know because not documented
- ☐ I don't know although documented
- ☐ Other (please specify)

**Q3: Please shortly specify the cause of the error:**

**Q4: Which corrective/preventive action was taken for this error?**

- ☐ Implement/optimize documentation (procedure)
- ☐ Protocol revision (technical)
- ☐ Change method/control tissue
- ☐ Contact company
- ☐ Staff training (internal)
- ☐ Staff training (external)
- ☐ None
- ☐ I don't know
- ☐ Other (please specify)

**Q4.1: If staff training, please clarify which kind:**

*e.g., Additional EQA participation, workshop, internal SOP revision,..*

**Q5: Who was responsible for this action?**

Quality manager

Lead laboratory technician

Laboratory technician

Molecular biologist

Pathologist

Laboratory director

Bio-informatician

Other (please specify)

**Q6: Was this error detected before or after the EQA results were released?**

☐ Before

☐ After

**Q6.1: If before, please specify how the error was identified:**

**Q7: Do you think about changing your test method in the next year?**

☐ Yes

☐ No

**Q7.1: If yes, please specify the new method:**

**Q8: Comments (optional):**

**B. GENERAL QUESTIONS** *To be completed only once*

**Q1: Did you change anything to the test protocol/method in the last 12 months?**

☐ Yes

☐ No

**Q1.1: If yes, please specify what was changed:**

**Q2: Who interprets the results?**

Quality manager

Lead laboratory technician

Laboratory technician

Molecular biologist

Pathologist

Laboratory director

Bio-informatician

Other (please specify)

**Q3: How is this person trained to interpret the results?**

Internal: performing validations

Internal: learning from colleagues with gradually more independence

Internal: participate to laboratory meetings

Internal: participate to laboratory meetings

External: workshop

No additional training, but learned from degree

Other (please specify)

**Q4: Who reports the results?**

Quality manager

Lead laboratory technician

Laboratory technician

Molecular biologist

Pathologist

Laboratory director

Bio-informatician

Other (please specify)

**Q5: On average, how long after release of the EQA report are the results reviewed?**

- ☐ Within a week after the release of the EQA report
- ☐ Within a month after release of the EQA report
- ☐ 1 month after release of the EQA report
- ☐ Only when there is an upcoming external audit
- ☐ Other (please specify)

**Q6: Are the EQA results discussed with other people from the laboratory in a meeting?**

- ☐ Yes, always
- ☐ Only in case of problematic results
- ☐ No
- ☐ Other (please specify)

**Q7: Do you organize continuous education related to quality assurance in the lab?**

- ☐ Yes
- ☐ No

**Q7.1: If yes, please specify:**

**Q8: On a scale from 1 to 10 (10 being the most important) how important do you rate participation to EQA?**

- ☐ 1
- ☐ 2
- ☐ 3
- ☐ 4
- ☐ 5
- ☐ 6
- ☐ 7
- ☐ 8
- ☐ 9
- ☐ 10

**Q9: Are the EQA samples treated differently in any way compared to routine diagnostic samples?**

- ☐ Yes
- ☐ No

**Q9.1: If yes, please specify how:**

**Q10: Are the persons working in the laboratory aware that they are handling samples for EQA?**

- ☐ Yes
- ☐ No

**Q11: Do you request an additional sample in case a technical failure occurred?**

- ☐ Yes, always
- ☐ Yes in routine practice but not for EQA
- ☐ No

**Q12: Do you correlate the molecular results with the clinical context (e.g., Frequency of variants)?**

- ☐ Yes
- ☐ No

**Q13: Do you ask for follow-up results of the patient with response to therapy?**

- ☐ Yes, occasionally for patients with specific variants
- ☐ Yes, during a multi-disciplinary team meeting.
- ☐ No
- ☐ No, although I would be interested.
- ☐ Other (please specify)

**Q14: Do you submit your results to a database?**

- ☐ No, a report for the oncologist is made only.
- ☐ Yes, our local pathology database.
- ☐ Yes, a national pathology database.
- ☐ Yes, a local oncology database with patient follow-up
- ☐ Other (please specify)

**THANK YOU FOR YOUR PARTICIPATION.**

**Table S2.** Relevant clauses in ISO 15189 included in Table 2 and 3 [3].

| ISO 15189 Clause | Description                                                                                                                                                                                                                                                                                                                                                                                                                                                                                   |
|------------------|-----------------------------------------------------------------------------------------------------------------------------------------------------------------------------------------------------------------------------------------------------------------------------------------------------------------------------------------------------------------------------------------------------------------------------------------------------------------------------------------------|
| 4.1.2.1          | Laboratory management shall continually improve its effectiveness by ensuring that all personnel are competent to perform their assigned activities and shall document personnel qualifications for each position. The qualifications shall reflect the appropriate education, training, experience and demonstrated skills needed, and be appropriate to the tasks performed.                                                                                                                |
| 4.1.2.2          | Laboratory management shall ensure that laboratory services, including appropriate advisory and interpretative services, meet the needs of patients and those using the laboratory services.                                                                                                                                                                                                                                                                                                  |
| 4.1.2.5          | Laboratory management shall ensure that responsibilities, authorities and interrelationships are defined, documented and communicated within the laboratory organization. This shall include the appointment of person(s) responsible for each laboratory function and appointment of deputies for key managerial and technical personnel. NOTE: in smaller laboratories individuals can have more than one function and that it could be impractical to appoint deputies for every function. |
| 4.1.2.6          | Laboratory management shall have an effective means for communicating with staff, records shall be kept of items discussed in communications and meetings.                                                                                                                                                                                                                                                                                                                                    |
| 4.2.2            | The quality management system shall include, but not be limited to, internal quality control and participation in organized interlaboratory comparisons such as external quality assessment schemes.                                                                                                                                                                                                                                                                                          |
| 4.7              | The laboratory shall establish arrangements for communicating with users on consulting on scientific and logistic matters such as instances of failure of sample(s) to meet acceptance criteria.                                                                                                                                                                                                                                                                                              |
| 4.9              | The laboratory shall have a documented procedure to identify and manage nonconformities. The procedure shall ensure that the responsibilities and authorities for                                                                                                                                                                                                                                                                                                                             |

|         |                                                                                                                                                                                                                                                                                                                                                                                                                                                                                                                     |
|---------|---------------------------------------------------------------------------------------------------------------------------------------------------------------------------------------------------------------------------------------------------------------------------------------------------------------------------------------------------------------------------------------------------------------------------------------------------------------------------------------------------------------------|
|         | handling nonconformities are designated, and that the immediate actions to be taken are defined.                                                                                                                                                                                                                                                                                                                                                                                                                    |
| 4.14.7  | The laboratory should establish quality indicators for systematically monitoring and evaluating the laboratory's contribution to patient care.                                                                                                                                                                                                                                                                                                                                                                      |
| 5.1.6   | Following appropriate training, the laboratory shall assess the competence of each person to perform assigned managerial or technical tasks according to established criteria. Reassessment shall take place at regular intervals. Retraining shall occur when necessary.                                                                                                                                                                                                                                           |
| 5.1.8   | A continuing education programme shall be available to personnel who participate in managerial and technical processes. Personnel shall take part in continuing education. The effectiveness of the continuing education programme shall be periodically reviewed. Personnel shall take part in regular professional development or other professional liaison activities.                                                                                                                                          |
| 5.1.9   | Records of the relevant educational and professional qualifications, training and experience, and assessments of competence of all personnel shall be maintained.                                                                                                                                                                                                                                                                                                                                                   |
| 5.6.2.3 | The laboratory shall have a procedure to prevent the release of patient results in the event of quality control failure.                                                                                                                                                                                                                                                                                                                                                                                            |
| 5.6.3.1 | The laboratory shall monitor the results of the interlaboratory comparison programme(s) and participate in the implementation of corrective actions when predetermined performance criteria are not fulfilled.                                                                                                                                                                                                                                                                                                      |
| 5.6.3.3 | The laboratory shall integrate interlaboratory comparison samples into the routine workflow in a manner that follows, as much as possible, the handling of patient samples. Interlaboratory comparison samples shall be examined by personnel who routinely examine patient samples using the same procedures as those used for patient samples.                                                                                                                                                                    |
| 5.6.3.4 | When predetermined performance criteria during interlaboratory comparisons are not fulfilled (i.e., nonconformities are present), staff shall participate in the implementation and recording of corrective action. The effectiveness of corrective action shall be monitored. The returned results shall be evaluated for trends that indicate potential nonconformities and preventive action shall be taken. The performance in interlaboratory comparisons shall be reviewed and discussed with relevant staff. |
| 5.6.4   | The laboratory shall participate in interlaboratory comparisons such as those organized by external quality assessment schemes.                                                                                                                                                                                                                                                                                                                                                                                     |
| 5.7.1   | The laboratory shall have procedures to ensure that authorized personnel review the results of examinations before release and evaluate them against internal quality control and, as appropriate, available clinical information and previous examination results.                                                                                                                                                                                                                                                 |
| 5.8.1   | The results of each examination shall be reported accurately, clearly, unambiguously and in accordance with any specific instructions in the examination procedures.                                                                                                                                                                                                                                                                                                                                                |
| 5.9.1   | The laboratory shall establish documented procedures for the release of examination results, including details of who may release results and to whom.                                                                                                                                                                                                                                                                                                                                                              |

**Table S3.** Overview of actions undertaken depending on the cause of the deviating EQA result.

|                                                | Cause of deviating EQA result             |                                          |                                            |                                  |                                 |                                  |                                               |                                 |
|------------------------------------------------|-------------------------------------------|------------------------------------------|--------------------------------------------|----------------------------------|---------------------------------|----------------------------------|-----------------------------------------------|---------------------------------|
|                                                | Interpretation Error<br>( <i>n</i> = 144) | Methodological Problem ( <i>n</i> = 105) | Problem with EQA Material ( <i>n</i> = 67) | Reagent Problem ( <i>n</i> = 52) | Clerical Error ( <i>n</i> = 46) | Personnel Error ( <i>n</i> = 36) | Technical Problem/ Equipment ( <i>n</i> = 25) | Unknown/ Other ( <i>n</i> = 39) |
| Staff training ( <i>n</i> = 78)                | 60.3                                      | 1.3                                      | 5.1                                        | 3.8                              | 3.8                             | 21.8                             | 1.3                                           | 2.6                             |
| Protocol revision ( <i>n</i> = 75)             | 14.7                                      | 18.7                                     | 10.7                                       | 28.0                             | 1.3                             | 12.0                             | 10.7                                          | 4.0                             |
| Implement/ optimise procedure ( <i>n</i> = 64) | 26.6                                      | 7.8                                      | 7.8                                        | 1.6                              | 40.6                            | 9.4                              | 1.6                                           | 4.7                             |
| Change method/ control ( <i>n</i> = 48)        | 6.3                                       | 56.3                                     | 6.3                                        | 20.8                             | 0.0                             | 0.0                              | 8.3                                           | 2.1                             |
| Retest sample ( <i>n</i> = 26)                 | 53.8                                      | 3.8                                      | 15.4                                       | 0.0                              | 0.0                             | 7.7                              | 3.8                                           | 15.4                            |
| Contact manufacturer ( <i>n</i> = 38)          | 18.4                                      | 44.7                                     | 0.0                                        | 21.1                             | 0.0                             | 0.0                              | 10.5                                          | 5.3                             |
| Contact EQA provider ( <i>n</i> = 17)          | 23.5                                      | 17.6                                     | 17.6                                       | 0.0                              | 11.8                            | 0.0                              | 23.5                                          | 5.9                             |
| Additional EQA participation ( <i>n</i> = 7)   | 42.9                                      | 0.0                                      | 14.3                                       | 14.3                             | 28.6                            | 0.0                              | 0.0                                           | 0.0                             |
| Unknown ( <i>n</i> = 19)                       | 21.1                                      | 15.8                                     | 5.3                                        | 0.0                              | 15.8                            | 0.0                              | 0.0                                           | 42.1                            |
| None ( <i>n</i> = 142)                         | 23.9                                      | 23.9                                     | 26.8                                       | 5.6                              | 6.3                             | 1.4                              | 1.4                                           | 10.6                            |

Abbreviations: EQA, external quality assessment.

**Table S4.** Laboratory characteristics and scores in next EQA scheme for the study cases.

| Laboratory Characteristics                                     | Number of Respondents/Cases | % of rEspondents/Cases<br>(n = 514) |
|----------------------------------------------------------------|-----------------------------|-------------------------------------|
| <b>Setting</b>                                                 |                             |                                     |
| Industry                                                       | 20                          | 3.9                                 |
| (private) laboratories                                         | 122                         | 23.7                                |
| Hospital laboratories                                          | 151                         | 29.4                                |
| University and/or research                                     | 221                         | 43.0                                |
| <b>All analyses under department of pathology</b>              |                             |                                     |
| Yes                                                            | 432                         | 84.0                                |
| No                                                             | 75                          | 14.6                                |
| Missing data                                                   | 7                           | 1.4                                 |
| <b>Accreditation</b>                                           |                             |                                     |
| Accredited                                                     | 243                         | 47.3                                |
| Not accredited                                                 | 220                         | 42.8                                |
| Missing data                                                   | 51                          | 9.9                                 |
| <b>Number of staff members involved in biomarker test</b>      |                             |                                     |
| 1–5                                                            | 234                         | 45.5                                |
| 6–10                                                           | 135                         | 26.3                                |
| 11–20                                                          | 89                          | 17.3                                |
| >20                                                            | 23                          | 4.5                                 |
| Missing data                                                   | 33                          | 6.4                                 |
| <b>Number of routine samples tested annually per biomarker</b> |                             |                                     |
| No clinical samples tested                                     | 12                          | 2.3                                 |
| <10                                                            | 15                          | 2.9                                 |
| 10–99                                                          | 119                         | 23.2                                |
| 100–249                                                        | 112                         | 21.8                                |
| 250–499                                                        | 74                          | 14.4                                |
| >500                                                           | 33                          | 6.4                                 |
| Missing data                                                   | 149                         | 29.0                                |
| <b>Change in test method in the last 12 months</b>             |                             |                                     |
| No                                                             | 339                         | 66.0                                |
| Yes                                                            | 109                         | 21.2                                |
| Missing data                                                   | 66                          | 12.8                                |
| <b>Methods of analysis</b>                                     |                             |                                     |
| <b>Commercially available method</b>                           | 257                         | 50.0                                |
| ALK FISH                                                       | 25                          | 4.9                                 |
| ROS1 FISH                                                      | 48                          | 9.3                                 |
| ALK IHC                                                        | 23                          | 4.5                                 |
| PDL1 IHC                                                       | 35                          | 6.8                                 |
| Variant analysis                                               | 126                         | 24.5                                |
| <b>Laboratory-developed method</b>                             | 140                         | 27.2                                |
| ALK IHC                                                        | 44                          | 8.6                                 |
| PD-L1 IHC                                                      | 34                          | 6.6                                 |
| ROS1 FISH                                                      | 1                           | 0.2                                 |
| ROS1 IHC                                                       | 20                          | 3.9                                 |
| Variant analysis                                               | 41                          | 8.0                                 |
| <b>Next-generation sequencing</b>                              | 47                          | 9.1                                 |
| <b>Not analyzed because error in digital case</b>              | 70                          | 13.6                                |
| <b>Successful performance in next EQA scheme</b>               |                             |                                     |
| Yes                                                            | 147                         | 28.6                                |
| No                                                             | 52                          | 10.1                                |
| Not determined*                                                | 315                         | 61.3                                |
| <b>Analysis error in next EQA scheme</b>                       |                             |                                     |
| Yes                                                            | 63                          | 12.3                                |

|                                        |     |      |
|----------------------------------------|-----|------|
| No                                     | 149 | 29.0 |
| Not determined*                        | 302 | 58.8 |
| <b>Test failure in next EQA scheme</b> |     |      |
| Yes                                    | 16  | 3.1  |
| No                                     | 196 | 38.1 |
| Not determined*                        | 302 | 58.8 |

\*The performance criteria in the next EQA scheme could not be determined for all laboratories as not all laboratories registered in the next scheme. Abbreviations: *ALK*, ALK receptor tyrosine kinase; EQA, external quality assessment; FISH, fluorescence in-situ hybridization; IHC, Immunohistochemistry; PD-L1, programmed death ligand 1; ROS1, ROS proto-oncogene 1.
